# Supplementary material for: Spectroscopic studies on CVD-grown monolayer, bilayer, and ribbon structures of WSe2 flakes
Source: Royal Society of Chemistry journal article supplement (doi:10.1039/d3qm00246b), 2023-01-01
Supplement: d3qm00246b1.pdf [file d3qm00246b1.pdf]

Electronic Supplementary Material (ESI) for Materials Chemistry Frontiers.  
This journal is © the Partner Organisations 2022

## Supplementary Material

### Spectroscopic studies of CVD-grown monolayer, bilayer, and ribbon structures of WSe<sub>2</sub> flakes

Girija Shankar Papanai<sup>a,b</sup> and Bipin Kumar Gupta<sup>a,b,\*</sup>

<sup>a</sup>Photonic Materials Metrology Sub Division, Advanced Materials and Device Metrology Division, CSIR-National Physical Laboratory, Dr. K. S. Krishnan Marg, New Delhi 110012, India

<sup>b</sup>Academy of Scientific and Innovative Research (AcSIR), Ghaziabad 201002, India

\*E-mail: bipinbhu@yahoo.com

#### S1. The Schematic Diagram of CVD Reaction Chamber

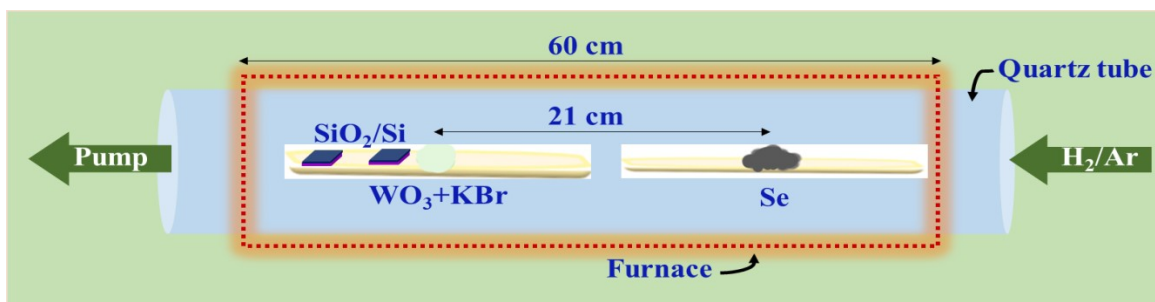

**Figure S1.** Schematic diagram of the reaction chamber for synthesis of WSe<sub>2</sub> flakes. The notations and symbols are in their usual meaning.

#### S2. X-ray Diffraction of Tungsten Oxide (WO<sub>3</sub>) and Selenium (Se) Powder

In order to probe the quality of precursors prior to the synthesis of WSe<sub>2</sub> flakes, XRD has been performed. Figure S2a illustrates that the XRD pattern of WO<sub>3</sub> powder and the peak positions are well indexed with the orthorhombic WO<sub>3</sub> [JCPDS card (Reference code: 98-005-0728)]. The XRD pattern of Se powder is shown in Figure S2b, and the peak positions are indexed with the hexagonal Se [JCPDS card (Reference code: 98-002-2251)].

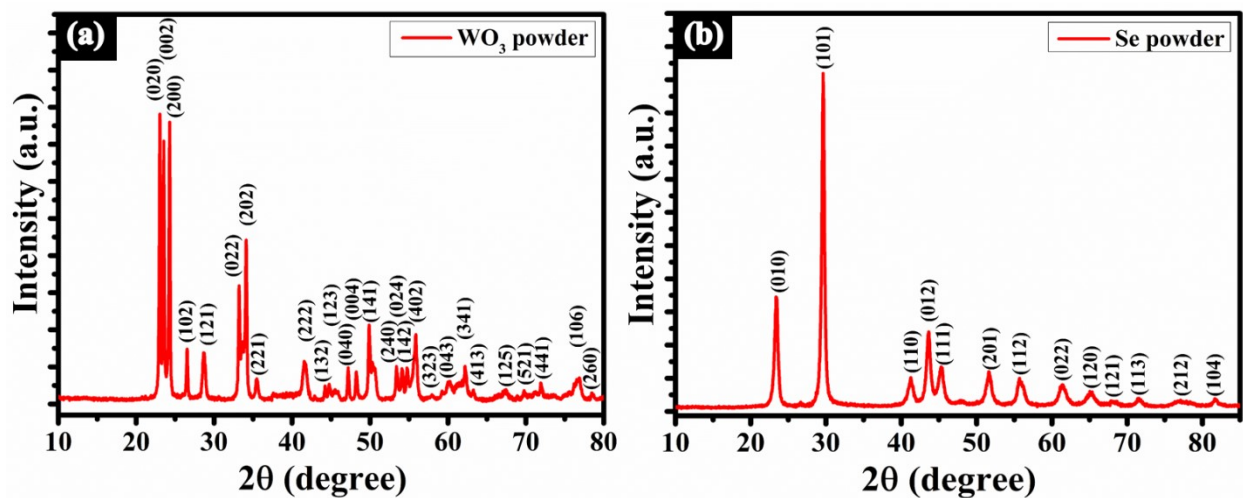

Figure S2. X-ray diffraction pattern of (a) WO<sub>3</sub> powder and (b) Se powder.

### S3. PL Spectroscopy of WSe<sub>2</sub> Flakes Deposited on Si/SiO<sub>2</sub> Substrate

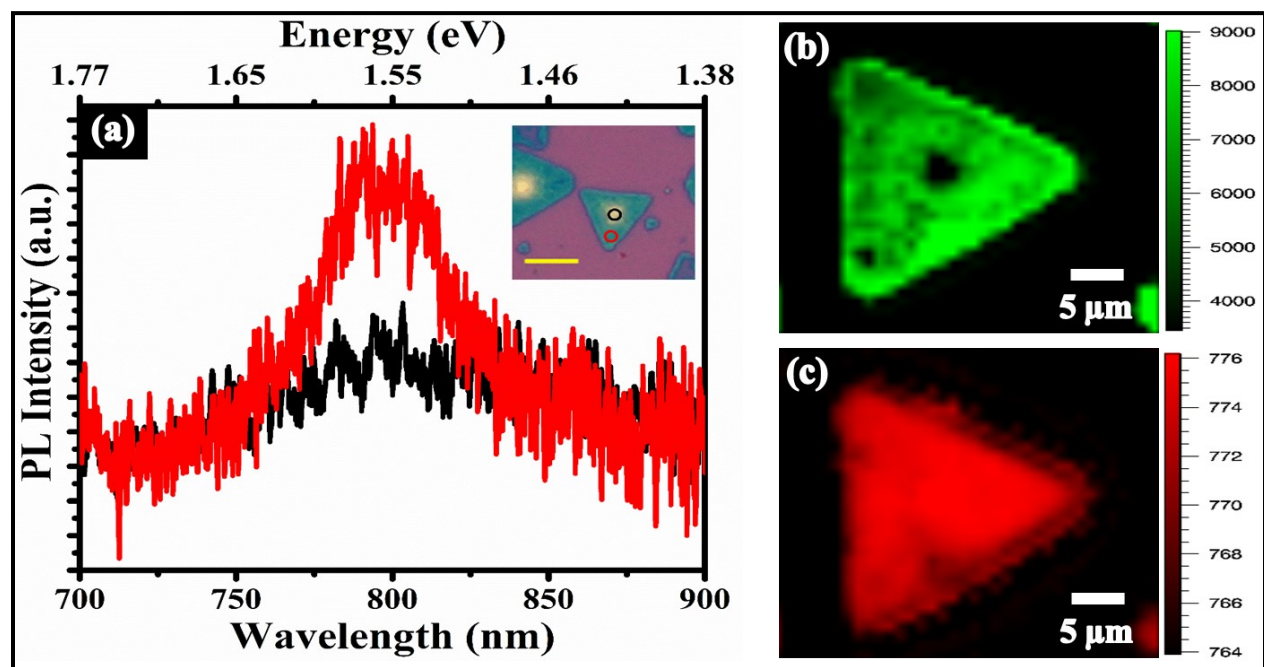

Figure S3. (a) PL spectra at the center and edge of the WSe<sub>2</sub> flake. Inset shows the optical image of the triangular WSe<sub>2</sub> flakes with a scale bar of 10 μm. The circular marks (black and red) in inset denote the locations where PL spectra are captured. PL mapping of A exciton peak in a triangular shape with respect to (b) peak intensity and (c) peak position.
